# Supplementary material for: Evaluation of Cocaine Effect on Endogenous Metabolites of HepG2 Cells Using Targeted Metabolomics
Source: MDPI journal article supplement (doi:10.3390/molecules26154610), 2021-07-29
Supplement: s1 [file s1]

# Evaluation of Cocaine Effect on Intracellular Small Polar Metabolites of Hepg2 Cells Using Targeted Metabolomics

Adamantios Krokos <sup>1</sup>, Olga Deda <sup>2,3</sup>, Christina Virgiliou <sup>1,3</sup>, Helen Gika <sup>2,3</sup>, Nikolaos Raikos <sup>2</sup>, Eleni Aggelidou <sup>4</sup>, Aristidis Kritis <sup>4</sup>, Georgios Theodoridis <sup>1,3\*</sup>

1 Department of Chemistry, Aristotle University of Thessaloniki, 54124 Thessaloniki, Greece;

[akrokosa@chem.auth.gr](mailto:akrokosa@chem.auth.gr) (A.K.), [cr\\_virgi@hotmail.com](mailto:cr_virgi@hotmail.com) (C.V.)

2 Laboratory of Forensic Medicine and Toxicology, Department of Medicine, Aristotle University of Thessaloniki, 54124 Thessaloniki, Greece; [oliadmy@gmail.com](mailto:oliadmy@gmail.com) (O.D.), [gkikae@auth.gr](mailto:gkikae@auth.gr) (H.G.), [raikos@auth.gr](mailto:raikos@auth.gr) (N.R.)

3 Biomic\_Auth, Bioanalysis and Omics Lab, B 1.4 Centre for Interdisciplinary Research of Aristotle University of Thessaloniki, Innovation Area of Thessaloniki, Balkan Center, Greece

4 Laboratory of Physiology and Pharmacology, School of Medicine, Aristotle University of Thessaloniki, Thessaloniki, 54124 Greece; [angelide@auth.gr](mailto:angelide@auth.gr) (E.A.), [kritis@auth.gr](mailto:kritis@auth.gr) (A.K.)

\* Correspondence: [gtheodor@chem.auth.gr](mailto:gtheodor@chem.auth.gr) ; Tel.: +30 2310 997718

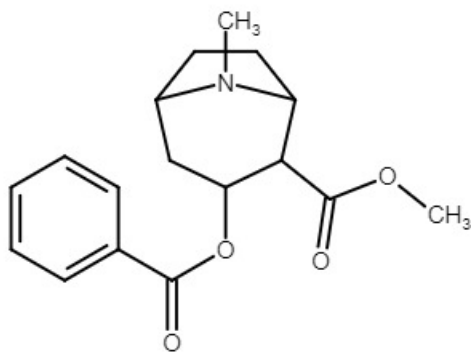

Figure S1. The structure of cocaine.

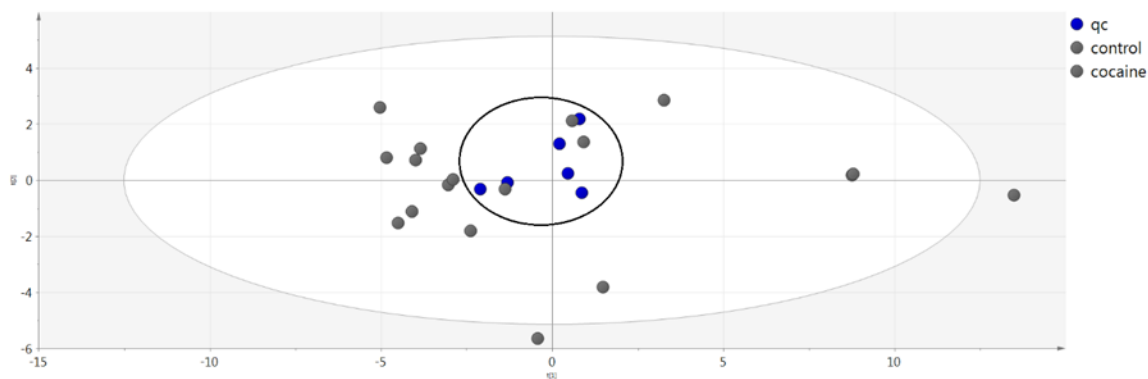

Figure S2. PCA model showing QC samples in blue and control and cocaine treated intracellular material samples in gray.

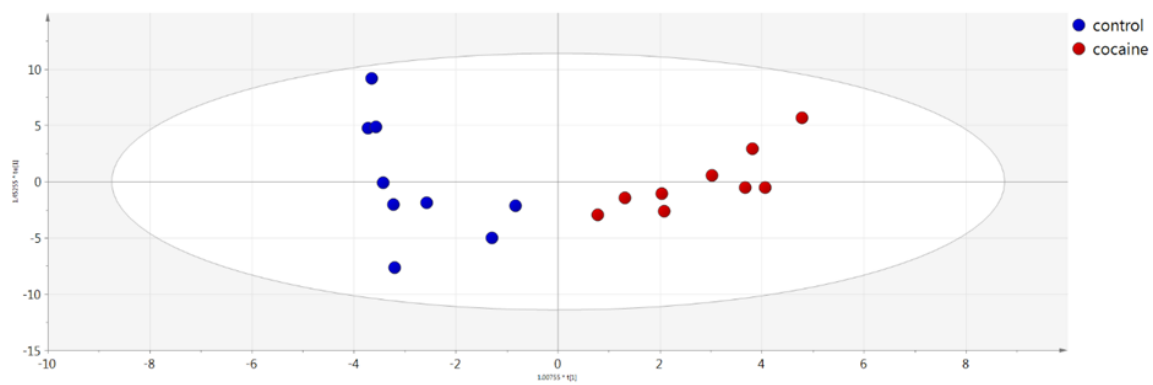

**Figure S3.** OPLS-DA model showing control (blue) and cocaine treated (red) intracellular samples which are discriminated clearly (all control samples in the left side and all the treated in the right side).

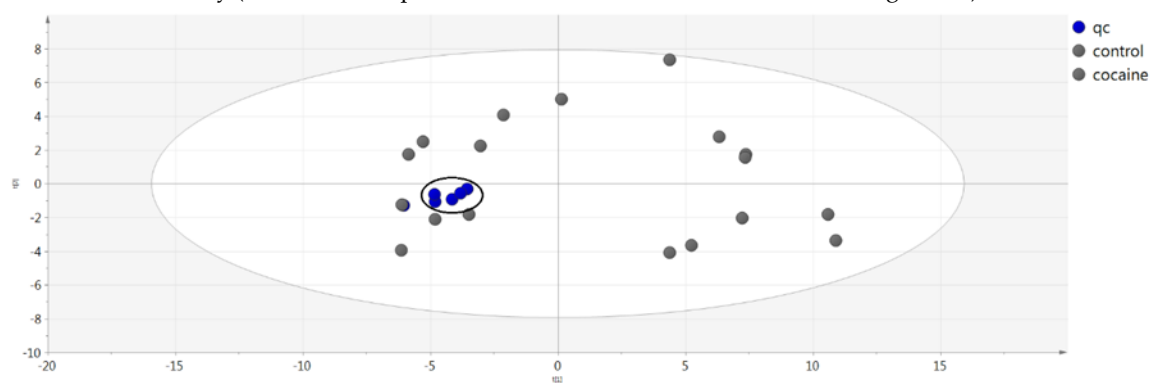

**Figure S4.** PCA model showing QC (blue) and control, cocaine treated cell medium samples (gray).

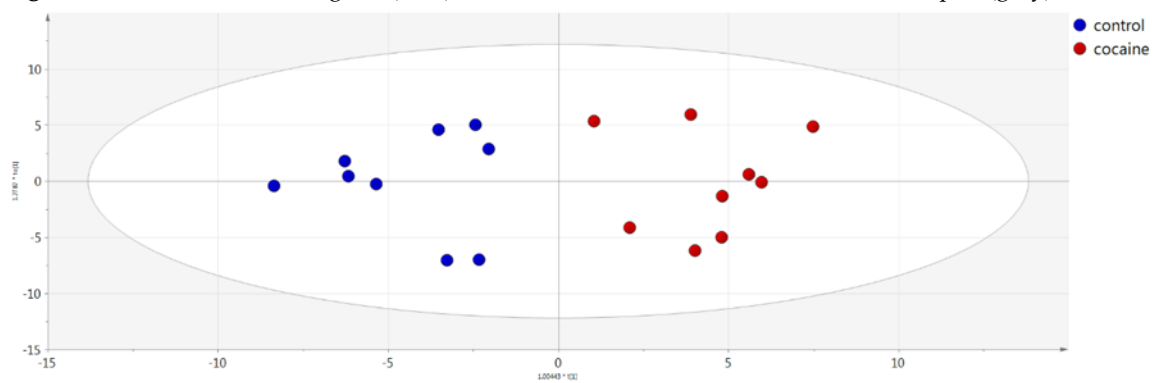

**Figure S5.** OPLS-DA model showing control (blue) and cocaine treated (red) cell medium samples.
